# Supplementary material
Source: PubMed Central journal article supplement (PMC149924)
Supplement: pnas_252641399_1.pdf [file pnas_252641399_1.pdf]

**Table 2. Productive T / B cooperation in tetraparental chimeras is only possible if CD4<sup>+</sup> T cells express TCR restricted to nonthymic MHC of B cells**

| Tetraparental Chimera                   | Thymic epithelial cells | T cells<br>B cells | T / B cooperation                                                         |
|-----------------------------------------|-------------------------|--------------------|---------------------------------------------------------------------------|
| SCID <sup>d</sup> ↔ nude <sup>b</sup>   | H-2 <sup>d</sup>        | H-2 <sup>b</sup>   | <p>H-2<sup>b</sup>-restricted TCR      H-2<sup>d</sup>-restricted TCR</p> |
| Rag-/- <sup>b</sup> ↔ nude <sup>d</sup> | H-2 <sup>b</sup>        | H-2 <sup>d</sup>   | <p>H-2<sup>d</sup>-restricted TCR      H-2<sup>b</sup>-restricted TCR</p> |
